# Supplementary material for: The role of Mediator and Little Elongation Complex in transcription termination
Source: Nat Commun. 2020 Feb 26;11:1063. doi: 10.1038/s41467-020-14849-1 (PMC7044329; doi:10.1038/s41467-020-14849-1)
Supplement: Supplementary file 5 — Supplementary Data 2 [file 41467_2020_14849_MOESM5_ESM.xlsx]

## Sheet: Supplementary Table S2
GeneID	Name	Biotype	AFF4_logFC	AFF4_FDR	ICE1_logFC	ICE1_FDR	Med26_logFC	Med26_FDR
ENSG00000197903	HIST1H2BK	protein_coding	NA	NA	1.38325	1.37e-68	2.16193	6.68e-188
ENSG00000186834	HEXIM1	protein_coding	NA	NA	0.708292	4.57e-67	1.03544	2.05e-150
ENSG00000189060	H1F0	protein_coding	NA	NA	0.603593	1.76e-43	1.05827	7.6e-134
ENSG00000276180	HIST1H4I	protein_coding	NA	NA	1.33163	3.6e-43	2.0775	2.47e-118
ENSG00000234289	H2BFS	protein_coding	NA	NA	1.2917	2.05e-29	2.06888	3.06e-83
ENSG00000124635	HIST1H2BJ	protein_coding	NA	NA	1.87933	1.9e-26	3.0428	8.67e-83
ENSG00000274750	HIST1H3E	protein_coding	NA	NA	1.57932	4.55e-20	2.66544	5.55e-73
ENSG00000172037	LAMB2	protein_coding	NA	NA	0.684457	2.28e-66	0.709562	1.47e-72
ENSG00000187837	HIST1H1C	protein_coding	NA	NA	1.88075	4.35e-31	2.72531	4.63e-72
ENSG00000184678	HIST2H2BE	protein_coding	NA	NA	0.880058	8.21e-08	2.43645	8.73e-71
ENSG00000168056	LTBP3	protein_coding	NA	NA	0.591428	1.13e-46	0.689096	8.36e-65
ENSG00000090238	YPEL3	protein_coding	NA	NA	1.27643	2.13e-56	1.27353	4.13e-57
ENSG00000261716	RP11-196G18.22	sense_overlapping	NA	NA	1.04947	1.65e-23	1.59323	1.41e-55
ENSG00000012822	CALCOCO1	protein_coding	NA	NA	0.830351	3.01e-49	0.839881	8.44e-51
ENSG00000158373	HIST1H2BD	protein_coding	NA	NA	1.94773	2.53e-24	2.62861	2.02e-47
ENSG00000124357	NAGK	protein_coding	NA	NA	0.938032	8.2e-50	0.891471	1.78e-45
ENSG00000104081	BMF	protein_coding	NA	NA	0.894186	8.79e-26	1.14497	1.24e-43
ENSG00000180998	GPR137C	protein_coding	NA	NA	1.09121	4.86e-34	1.19334	6.38e-42
ENSG00000233822	HIST1H2BN	protein_coding	NA	NA	1.24325	5.75e-23	1.61765	8.27e-42
ENSG00000197774	EME2	protein_coding	NA	NA	0.590775	2.74e-36	0.622115	1.06e-40
ENSG00000265972	TXNIP	protein_coding	NA	NA	1.03473	2.92e-39	1.03529	2.29e-39
ENSG00000124657	OR2B6	protein_coding	NA	NA	2.4249	1.18e-12	3.85426	4.45e-39
ENSG00000033100	CHPF2	protein_coding	NA	NA	0.697756	2.32e-42	0.616362	2.3e-33
ENSG00000186166	CCDC84	protein_coding	NA	NA	0.947767	1.74e-70	0.621569	3.27e-30
ENSG00000166311	SMPD1	protein_coding	NA	NA	1.20871	9.19e-54	0.913979	4.57e-30
ENSG00000021762	OSBPL5	protein_coding	NA	NA	0.711723	6.3e-32	0.596115	1.09e-22
ENSG00000180573	HIST1H2AC	protein_coding	NA	NA	1.80715	2.13e-12	2.39954	1.88e-22
ENSG00000272468	RP1-86C11.7	lincRNA	NA	NA	2.0598	2.83e-09	2.94413	1.94e-22
ENSG00000090097	PCBP4	protein_coding	NA	NA	0.717107	1.21e-12	0.914034	1.16e-20
ENSG00000280287	RP13-554M15.7	TEC	NA	NA	1.02107	9.51e-21	0.994586	5.85e-20
ENSG00000172379	ARNT2	protein_coding	NA	NA	0.656913	1.6e-14	0.757843	2.37e-19
ENSG00000196118	CCDC189	protein_coding	NA	NA	0.691648	1.13e-11	0.877081	4.38e-19
ENSG00000105290	APLP1	protein_coding	NA	NA	0.955665	1.47e-26	0.800867	7.39e-19
ENSG00000196890	HIST3H2BB	protein_coding	NA	NA	0.626323	0.00249027	1.60242	1.18e-18
ENSG00000180596	HIST1H2BC	protein_coding	NA	NA	0.96003	0.0134833	2.81104	1.58e-18
ENSG00000196787	HIST1H2AG	protein_coding	NA	NA	0.852587	3.25e-05	1.60483	6.67e-17
ENSG00000144959	NCEH1	protein_coding	NA	NA	1.26615	1.88e-53	0.708716	3.31e-16
ENSG00000182685	BRICD5	protein_coding	NA	NA	1.25438	6.56e-43	0.743581	1.09e-14
ENSG00000168126	OR2W6P	unprocessed_pseudogene	NA	NA	1.34025	0.0180716	3.35811	2.48e-14
ENSG00000168071	CCDC88B	protein_coding	NA	NA	0.624848	6.53e-08	0.807526	8.75e-13
ENSG00000278828	HIST1H3H	protein_coding	NA	NA	1.10162	2.6e-05	1.76596	9.93e-13
ENSG00000158406	HIST1H4H	protein_coding	NA	NA	1.29285	0.00114336	2.536	1.85e-12
ENSG00000130600	H19	processed_transcript	NA	NA	1.25573	9.98e-12	1.2729	3.67e-12
ENSG00000175463	TBC1D10C	protein_coding	NA	NA	0.824243	0.000602086	1.50241	4.53e-12
ENSG00000274641	HIST1H2BO	protein_coding	NA	NA	1.70542	7.71e-06	2.34786	1.18e-11
ENSG00000111678	C12orf57	protein_coding	NA	NA	0.934434	1.92e-22	0.655845	2.83e-11
ENSG00000047346	FAM214A	protein_coding	NA	NA	1.03602	5.66e-28	0.649501	3.17e-11
ENSG00000163795	ZNF513	protein_coding	NA	NA	0.629008	6.23e-11	0.629185	4.46e-11
ENSG00000180190	TDRP	protein_coding	NA	NA	1.04976	1.06e-08	1.17754	4.91e-11
ENSG00000136052	SLC41A2	protein_coding	NA	NA	0.747259	1.01e-12	0.68353	7.69e-11
ENSG00000143344	RGL1	protein_coding	NA	NA	0.65403	2.87e-10	0.641005	5.77e-10
ENSG00000205413	SAMD9	protein_coding	NA	NA	0.917493	1.15e-11	0.793576	6.3e-09
ENSG00000149564	ESAM	protein_coding	NA	NA	1.5582	4.63e-19	1.04752	1.15e-08
ENSG00000090539	CHRD	protein_coding	NA	NA	0.761711	3.08e-11	0.639162	3.73e-08
ENSG00000203814	HIST2H2BF	protein_coding	NA	NA	1.10655	0.00760355	1.89414	5.91e-07
ENSG00000203362	RP3-337H4.8	antisense	NA	NA	0.888277	1.49e-10	0.706182	6.73e-07
ENSG00000091592	NLRP1	protein_coding	NA	NA	0.684702	2.36e-08	0.611935	7.87e-07
ENSG00000271895	RP4-635E18.8	antisense	NA	NA	0.663593	3.78e-07	0.639106	1.02e-06
ENSG00000254876	RP11-23J9.5	processed_transcript	NA	NA	1.36925	9.39e-15	0.895407	1.52e-06
ENSG00000235016	SEMA3F-AS1	antisense	NA	NA	0.669536	9.13e-07	0.644834	2.24e-06
ENSG00000270127	RP11-526I2.5	lincRNA	NA	NA	1.53565	1.52e-22	0.794376	4.86e-06
ENSG00000198626	RYR2	protein_coding	NA	NA	0.794495	5.01e-06	0.775639	9.14e-06
ENSG00000005238	FAM214B	protein_coding	NA	NA	0.749551	3.44e-06	0.71672	1e-05
ENSG00000143387	CTSK	protein_coding	NA	NA	0.976605	1.5e-09	0.73302	1.14e-05
ENSG00000163406	SLC15A2	protein_coding	NA	NA	0.653568	0.000322274	0.769075	1.31e-05
ENSG00000258643	BCL2L2-PABPN1	protein_coding	NA	NA	1.06416	2.47e-08	0.850864	1.6e-05
ENSG00000233871	DLG5-AS1	processed_transcript	NA	NA	0.777901	0.000145121	0.858233	1.9e-05
ENSG00000275450	PTGER4P2-CDK2AP2P2	lincRNA	NA	NA	0.607255	0.0312223	1.09397	3.48e-05
ENSG00000278949	RP11-46H11.11	TEC	NA	NA	0.769302	1.16e-06	0.661461	3.9e-05
ENSG00000154099	DNAAF1	protein_coding	NA	NA	1.0333	1.92e-08	0.782634	3.92e-05
ENSG00000139970	RTN1	protein_coding	NA	NA	0.588505	0.000465211	0.679338	4.28e-05
ENSG00000229431	RP1-92O14.6	antisense	NA	NA	0.700777	0.0175398	1.12797	4.62e-05
ENSG00000172346	CSDC2	protein_coding	NA	NA	0.619569	0.0137992	0.961835	4.64e-05
ENSG00000280143	AP000892.6	TEC	NA	NA	0.717174	8.02e-06	0.65864	4.74e-05
ENSG00000213760	ATP6V1G2	protein_coding	NA	NA	1.37677	2.98e-09	0.994824	5.28e-05
ENSG00000116032	GRIN3B	protein_coding	NA	NA	1.03958	0.000110615	1.06913	7.17e-05
ENSG00000125740	FOSB	protein_coding	NA	NA	1.02547	4.25e-10	0.676686	7.57e-05
ENSG00000186594	MIR22HG	lincRNA	NA	NA	0.879618	1.76e-05	0.806382	9.65e-05
ENSG00000179750	APOBEC3B	protein_coding	NA	NA	0.730061	0.0135794	1.08516	0.000134642
ENSG00000261587	TMEM249	protein_coding	NA	NA	0.699856	0.00217675	0.846715	0.000135742
ENSG00000204427	ABHD16A	protein_coding	NA	NA	0.623834	9.45e-05	0.600601	0.000185835
ENSG00000278206	RP1-20N2.8	processed_transcript	NA	NA	1.06961	4e-06	0.8856	0.000209777
ENSG00000266993	RP4-657D16.3	antisense	NA	NA	0.913004	0.000547331	0.96081	0.000231587
ENSG00000165272	AQP3	protein_coding	NA	NA	0.60644	0.00050908	0.627608	0.000344217
ENSG00000132718	SYT11	protein_coding	NA	NA	2.2428	2.89e-28	0.847923	0.000457003
ENSG00000246851	RP11-544A12.8	antisense	NA	NA	0.716618	0.0181223	0.998364	0.000535168
ENSG00000182179	UBA7	protein_coding	NA	NA	1.48772	7.04e-12	0.798697	0.000788269
ENSG00000198835	GJC2	protein_coding	NA	NA	1.63134	1.77e-05	1.3046	0.000903491
ENSG00000010704	HFE	protein_coding	NA	NA	0.693392	0.00782169	0.836347	0.000941538
ENSG00000177875	CCDC184	protein_coding	NA	NA	0.784932	2.6e-05	0.631855	0.000975604
ENSG00000116039	ATP6V1B1	protein_coding	NA	NA	1.09429	5.93e-11	0.586521	0.00129015
ENSG00000259921	AC022819.3	sense_intronic	NA	NA	0.965356	0.00112698	0.946516	0.00151671
ENSG00000276334	AL133243.1	sense_intronic	NA	NA	1.09589	4.25e-07	0.728231	0.00155345
ENSG00000271806	RP5-892K4.1	antisense	NA	NA	0.930687	1.8e-06	0.635323	0.00211445
ENSG00000261616	RP11-6O2.3	antisense	NA	NA	0.947028	0.000324969	0.816241	0.00245764
ENSG00000260244	RP11-588K22.2	sense_overlapping	NA	NA	0.594636	0.00581368	0.642723	0.0026968
ENSG00000188501	LCTL	protein_coding	NA	NA	0.78928	0.00724613	0.871403	0.00290164
ENSG00000279522	CTC-487M23.6	TEC	NA	NA	1.20242	1.16e-10	0.591069	0.00435652
ENSG00000132932	ATP8A2	protein_coding	NA	NA	0.688369	0.0480319	0.953252	0.00480508
ENSG00000275910	RP11-680G24.6	antisense	NA	NA	0.715194	0.0165862	0.82246	0.00506061
ENSG00000180089	TMEM86B	protein_coding	NA	NA	0.643122	0.00817713	0.681914	0.00518041
ENSG00000115896	PLCL1	protein_coding	NA	NA	1.16468	3.83e-07	0.694774	0.00522209
ENSG00000254363	CTB-131B5.5	processed_transcript	NA	NA	1.35963	7.35e-07	0.822633	0.0060171
ENSG00000140465	CYP1A1	protein_coding	NA	NA	0.594194	0.0147293	0.660268	0.00620539
ENSG00000108785	HSD17B1P1	unprocessed_pseudogene	NA	NA	1.12298	3.42e-05	0.784565	0.00671216
ENSG00000203684	IBA57-AS1	lincRNA	NA	NA	0.865289	0.00353392	0.786784	0.00938606
ENSG00000270589	RP11-348N5.7	antisense	NA	NA	0.743168	0.00158464	0.623801	0.0103063
ENSG00000116819	TFAP2E	protein_coding	NA	NA	0.877147	0.000344413	0.638215	0.0132191
ENSG00000260428	SCX	protein_coding	NA	NA	1.06942	3.13e-05	0.673016	0.0147809
ENSG00000117281	CD160	protein_coding	NA	NA	1.19442	1.6e-06	0.660821	0.0151046
ENSG00000137261	KIAA0319	protein_coding	NA	NA	0.796621	0.0123017	0.782514	0.0155859
ENSG00000280665	RP11-35J6.1	TEC	NA	NA	0.742634	0.00342327	0.627878	0.0165083
ENSG00000229598	PRDX3P1	processed_pseudogene	NA	NA	0.93093	0.00319549	0.777848	0.0170226
ENSG00000127578	WFIKKN1	protein_coding	NA	NA	1.84486	6.68e-19	0.595629	0.0177722
ENSG00000181392	SYNE4	protein_coding	NA	NA	1.15082	1.02e-05	0.656876	0.0201597
ENSG00000273428	RP4-539M6.22	lincRNA	NA	NA	2.56812	1.1e-15	0.9113	0.0238931
ENSG00000261652	C15orf65	protein_coding	NA	NA	0.67099	0.0201443	0.655862	0.0246373
ENSG00000124140	SLC12A5	protein_coding	NA	NA	0.704764	0.0170624	0.669614	0.0250877
ENSG00000271828	CTD-2310F14.1	antisense	NA	NA	1.0354	0.000387701	0.69166	0.0269854
ENSG00000249699	RP11-415C15.2	lincRNA	NA	NA	0.627962	0.0399624	0.670639	0.0288382
ENSG00000262848	RP11-517A5.5	antisense	NA	NA	1.00315	0.000859916	0.694399	0.0310173
ENSG00000267150	RP11-411B10.2	antisense	NA	NA	0.919493	0.00270046	0.687473	0.0322926
ENSG00000170959	DCDC1	protein_coding	NA	NA	0.716334	0.00983348	0.590335	0.0403917
ENSG00000272217	XXbac-BPG157A10.21	lincRNA	NA	NA	1.00419	0.00233244	0.712499	0.0424362
