# Supplementary material for: The role of Mediator and Little Elongation Complex in transcription termination
Source: Nat Commun. 2020 Feb 26;11:1063. doi: 10.1038/s41467-020-14849-1 (PMC7044329; doi:10.1038/s41467-020-14849-1)
Supplement: Supplementary file 7 — Supplementary Data 4 [file 41467_2020_14849_MOESM7_ESM.xlsx]

## Sheet: sn_result
GeneID	gene_name	gene_biotype	logFC_PolyA	FDR_PolyA
ENSG00000212232	SNORD17	snoRNA	-0.629379	1.62e-09
ENSG00000206897	SNORA9B	snoRNA	1.10578	0.00121805
ENSG00000200087	SNORA73B	snoRNA	-0.982209	0.00133536
ENSG00000231587	SNORD62B	snoRNA	0.67943	0.00199674
ENSG00000206603	SNORA22B	snoRNA	-0.999743	0.00558606
ENSG00000201512	SNORA71C	snoRNA	-0.601353	0.0146707
ENSG00000252743	RNU6-850P	snRNA	0.587538	0.0325368
ENSG00000206754	SNORD101	snoRNA	-0.899674	0.0419377
ENSG00000251994	RNU2-27P	snRNA	-0.842874	0.0523356
ENSG00000201302	SNORA65	snoRNA	0.402391	0.0819952
ENSG00000252498	RNU6-1016P	snRNA	0.541305	0.0952507
